# Supplementary material for: Flicker-assisted localization microscopy reveals altered mitochondrial architecture in hypertension
Source: PubMed Central journal article supplement (PMC4655370; doi:10.1038/srep16875), 2015-11-23

**Title:** Flicker-assisted localization microscopy reveals altered mitochondrial architecture in hypertension

Susan Chalmers<sup>1</sup>, Christopher Saunter<sup>2</sup>, John M. Girkin<sup>2</sup>, John G. McCarron<sup>1\*</sup>:

<sup>1</sup>Strathclyde Institute of Pharmacy & Biomedical Sciences, 161 Cathedral Street, University of Strathclyde, Glasgow G4 0RE, UK;

<sup>2</sup>Department of Physics, Durham University, South Road, Durham DH1 3LE, UK

Correspondence should be addressed to J.G.M. (email: [john.mccarron@strath.ac.uk](mailto:john.mccarron@strath.ac.uk); tel: +44 141 548 4119).

## Supplementary Information

### Figure Legends

**Supplementary Video 1 | 3D projection of mitochondria within a freshly-isolated resistance artery smooth muscle cell.** The live cell was loaded with TMRE (62.5 nM) and epifluorescence images taken with increasing z-depth (250 x 100 nm steps). The images were then deconvolved using a 60-iteration blind 3D-deconvolution as described in Methods. The resulting image stack was rotated in the y-axis first at full 512x512 pixel/76.8x76.8  $\mu\text{m}$  x-y magnification, followed by a 2x then a 5.2x zoom to show mitochondrial architecture.

**Supplementary Video 2 | Mitochondrial flickering and localized fluorescence intensity changes detected by FaLM processing.** A freshly-isolated smooth muscle cell loaded with TMRE (62.5 nM) and imaged by convention XYT epifluorescence displays localized fluctuations in fluorescence as individual mitochondria transiently de- and re-polarize (upper panels, right-hand box is close up of the whole cell shown in the left-hand box). The image stack was then processed by FaLM and the resultant  $dl/dt$  stack overlaid to show depolarizations in red and repolarizations in blue (lower panels). Scale bars 10  $\mu\text{m}$ .

**Supplementary Figure 1 | Full description of FaLM image processing.** A: FaLM processing of the TMRE image stacks was a multi-step process. The first pass (i) created an image stack (*all\_on*) in which all pixels were projected at their maximum intensity within a broad bracketing range to accommodate movement artefacts. ii: Each plane of the original image stack ( $f(t)$ ) was then subtracted from the time-matched plane from *all\_on* to create a stack of difference from maximum (*Delta*). The third pass (iii) looked for changes within *Delta* to create a stack showing depolarizations as bright spots and repolarizations as dark holes ( $dD/dt$ ). These on and off events were then recombined to provide a

guide for the user to locate mitochondria. The fourth pass (iv) analyzed the temporal and spatial covariance of the  $dD/dt$  events to define mitochondrial *objects*, which were then be recombined (v) to provide an image of all individual mitochondrial units (vi) or intensity-thresholded to define boundaries (vii) and allow spatial measurements. B: example images of a resistance artery smooth muscle cell taken through FaLM processing, whole cell in larger images (i and below) and close-up of networked-like region in smaller images (ii and below) with corresponding intensity plots from single point (iii and below).

### Supplementary Video 1

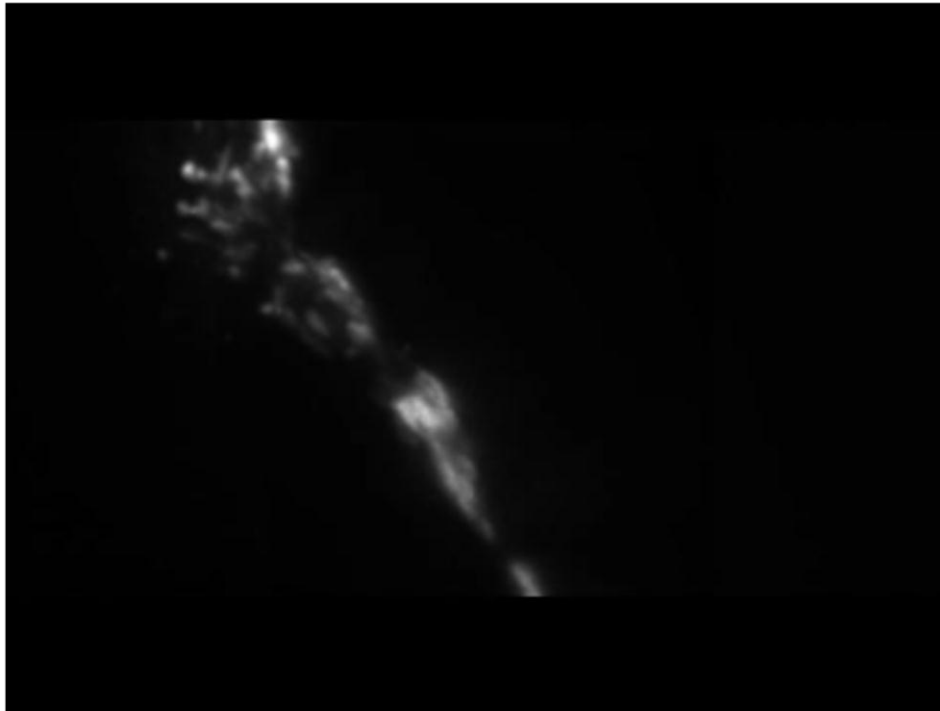

Supplementary Video 2

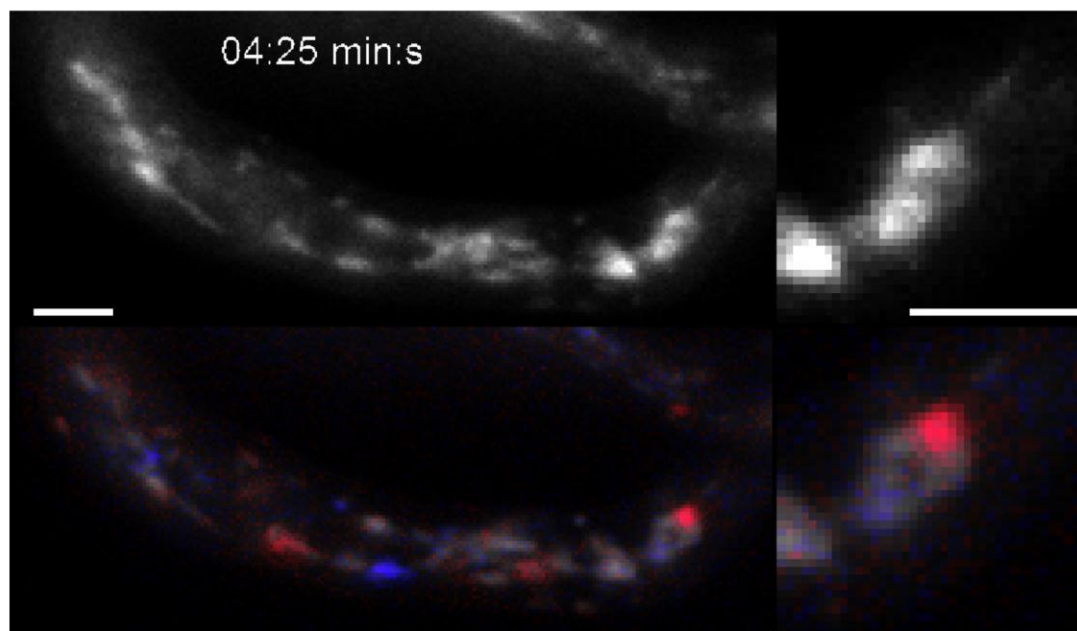

# Supplementary Figure 1

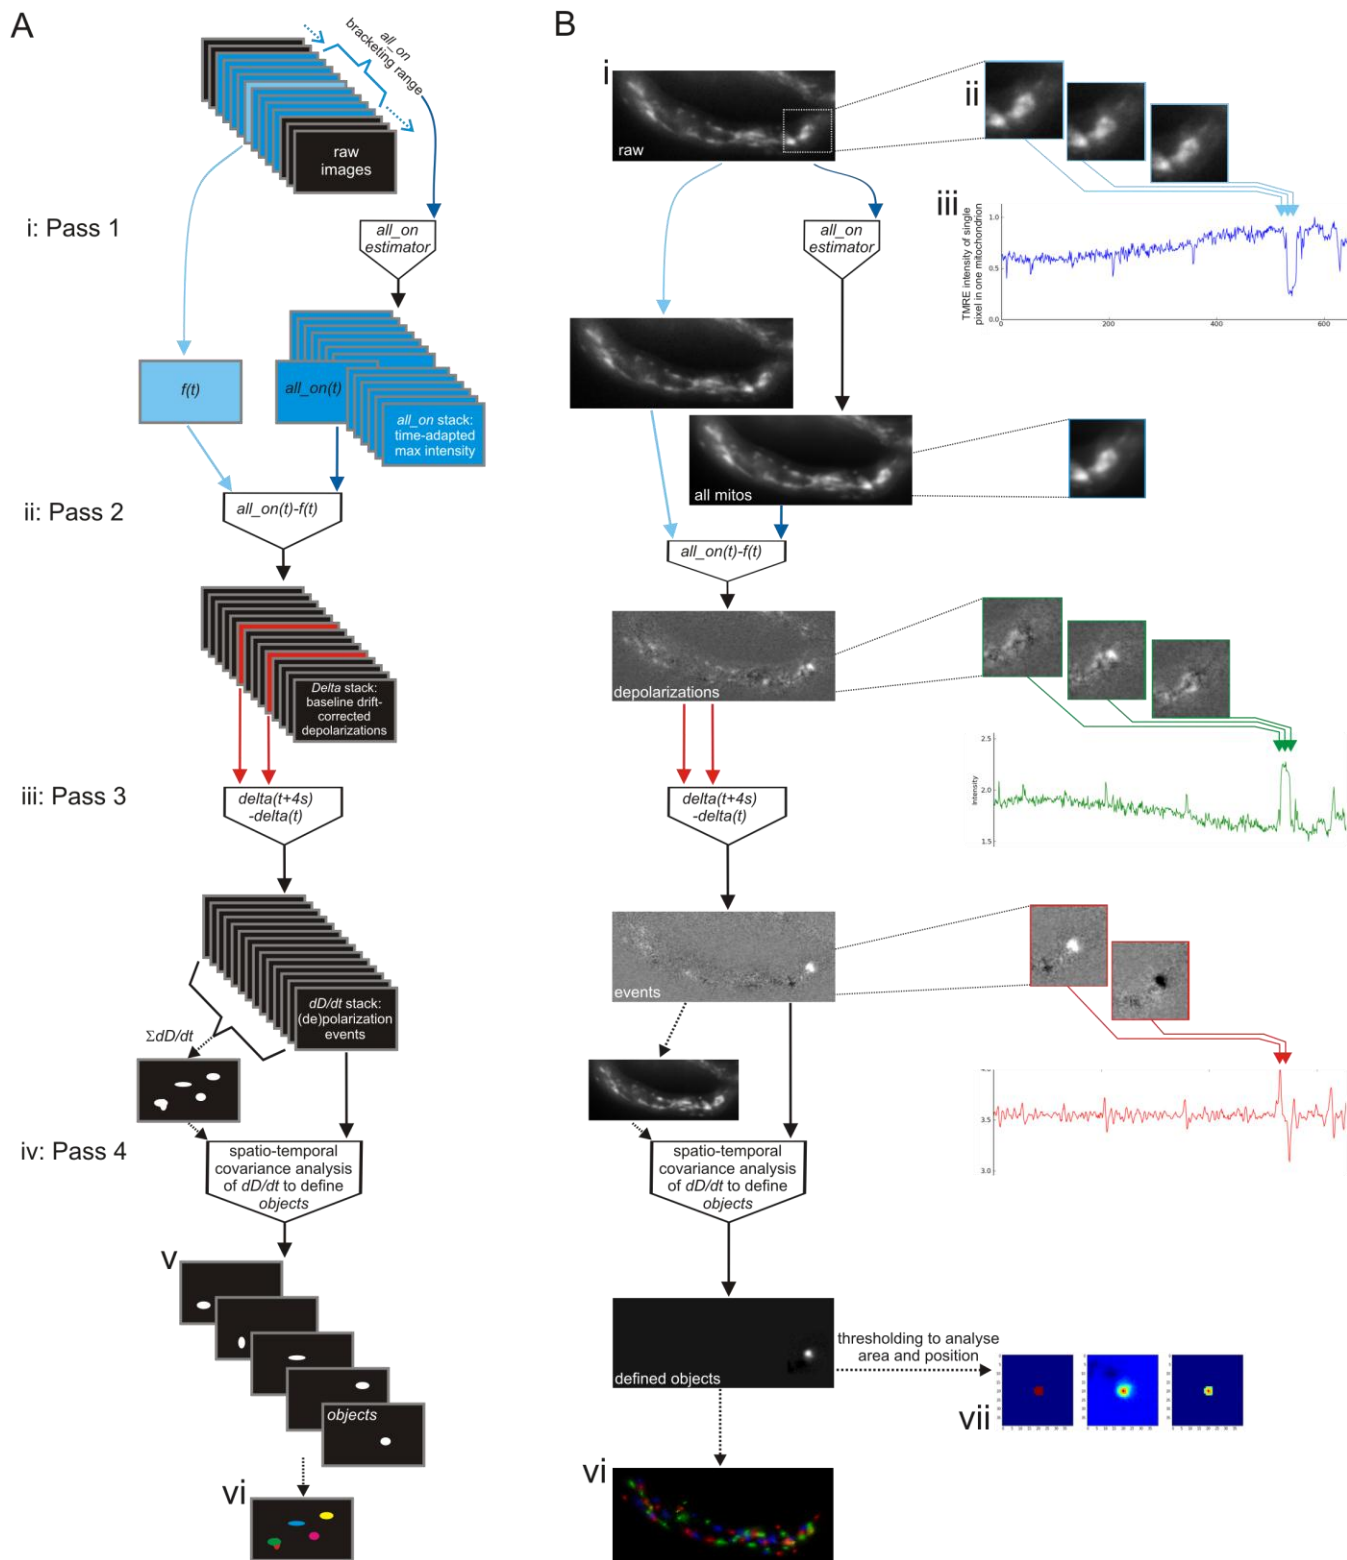

Supplement: srep16875-s1.pdf [file srep16875-s1.pdf]
